# Supplementary material for: Enhancing WNT Signaling Restores Cortical Neuronal Spine Maturation and Synaptogenesis in Tbr1 Mutants
Source: PubMed Central journal article supplement (PMC7473600; doi:10.1016/j.celrep.2020.03.059), 2020-04-14

**Cell Reports, Volume 31**

**Supplemental Information**

**Enhancing WNT Signaling Restores  
Cortical Neuronal Spine Maturation  
and Synaptogenesis in *Tbr1* Mutants**

**Siavash Fazel Darbandi, Sarah E. Robinson Schwartz, Emily Ling-Lin Pai, Amanda Everitt, Marc L. Turner, Benjamin N.R. Cheyette, A. Jeremy Willsey, Matthew W. State, Vikaas S. Sohal, and John L.R. Rubenstein**

**Table S5: Related to Figure 2.** Complete list of DNA FASTA sequences that were cloned to generate DIG-labeled RNA probes for ISH experiments.

| Recombinant DNA                                                                                                                                                                                                                                                                                                                                                                                                                                                                                                                                                                                                                                                                                                                                                                                                                                                                                                                                                                                                                                                                                                                                                                                                                                                                              |
|----------------------------------------------------------------------------------------------------------------------------------------------------------------------------------------------------------------------------------------------------------------------------------------------------------------------------------------------------------------------------------------------------------------------------------------------------------------------------------------------------------------------------------------------------------------------------------------------------------------------------------------------------------------------------------------------------------------------------------------------------------------------------------------------------------------------------------------------------------------------------------------------------------------------------------------------------------------------------------------------------------------------------------------------------------------------------------------------------------------------------------------------------------------------------------------------------------------------------------------------------------------------------------------------|
| <p><i>&gt;Tbr1</i><br/>           CACTCGCTCTTTCACTTGACCCTCGATGACCGTCTGCGGGGATAAGTGCAGGTCTCTCACTATGATTTTAAAACCTCTTCTTTTT<br/>           CTTTCTTTCTTTCTCTACACAGCCTTCTCTGCAGTTAGCGCACCGACCTTGAACCTGGCTGTAAACCTTGTGGTTTTCCAACCT<br/>           TTCGTCTGTGAGGTTATGATCCTCCCTGTCTTTTTCCACCCCTTCTCCTTGCCCACTCATCCTCTCCTTTCTCTTGGGAATGAA<br/>           ACTCTTCAACTTAGGAGACCTGGGCAATCTGCCAGGCAGCAGCGATTCCGACCCGCCTTGTCTTGGCCTCCCTATTTAACCA<br/>           TAGGATGTTGACTAGAACCTGCACCCACCCAGCGCGTCTTTCTTATACCCGAGTGGATGGATGGATGGATGGATGGATGGATGG<br/>           TAGGGATGTTAATACTTTTAGTGGAAACAAAGCCTGTGAAATGATTGTATATAGTGTAAATTTATTGTAACGAATGGCTAGTTTT<br/>           TATTCTCATTGCAAGGCACAAAACCCAGTTCACGCTTAACTTTTTATTCCCTTTCCTTTCTTCTCCTTTTTCTTTTTCTCCTCTCATT<br/>           TTCTCTTCTCCACACCCTTTGTTTTCTTGTGAGTTATTTAAAGATATTCTAAGAGGCTCTGGAAACACGAAGCACTTCATAGTG<br/>           TGGCTTCTCACTCAGTTCTGTCATGATGTAACCACTGTTGCGCTGTTTGCAGTGGTGCACACAATGTAGCTAAGGAGAATGCCACT<br/>           GAACACCTGTAAAAGCTAGTTGTCTGTCTTAGGGCAGTCGAGTAAGTGACACGATGCCTGCCAGGCGGACTTAACTGGAGTT<br/>           CTATGTGTTTCTCCTTCTCTAAATGGAATGGCCCCACATCAGCAATATTATTTGCTTATTGTTTTTCCCAAAGTGCCA<br/>           AATCCATTACTGGTCTGTGCAGGTGCCAAAATATGCTGATAAACTGTTTCTGACTATCTTTTCAGACCCCACTC</p>                                   |
| <p><i>&gt;Nr4a2</i><br/>           GACAGCAGTCCCTCATTAAAGGTAGAAGACATTCAGATGCACAACCTACCAGCAACACAGCCACCTGCCCCCTCAGTCCGAGGAG<br/>           ATGATGCCACACAGCGGGTTCGTTTACTACAAGCCCTTTCGCCCCGACACCCAGCACCCCGAGCTTCCAGGTGCAGCATAG<br/>           CCGGATGTGGGACGATCCGGCTCCCTTCAACAACCTCCACAGAACCTACGTGGCCACTACGCATATGATCGAGCAGAGGAAGA<br/>           CACCTGTCTCCCGCTGTCACTCTTCTCCTTTAAGCAGTCGCCCCGGGCACTCCTGTGTCTAGCTGCCAGATGCGCTTCGACGG<br/>           GCCTTGCACGTCCCATGAACCCGGAGCCCGGGCAGCCACCACGTAGTGGATGGGCGAGACCTTCCGCGTGCCAAACCCCA<br/>           TTCGAAGCCGGCATCCATGGGCTTCCCGGGCCTGCAGATCGGGCCACGCATCGCAGTTGCTTGACACGCAGGTGCCCTCGCCG<br/>           GCTCCCGGGCTCTCCCTCCAATGAGGGTCTGTGCGCTGTTTGCAGTGGTGCACACGCGGCTGTGACACTACGGTGTTCGCACT<br/>           TGTGAGGGCTGCAAAGGTTCTTTAAGCGCACGGTGCAAAAAACGCGAAAATATGTGTGTTTAGCAAATAAAAACTGCCAGT<br/>           GGACAAGCGCCGCCAAAATCGTTGTCAGTACTGTGCGTTTTCAGAAGTGCCTAGCTGTTGGGATGGTTAAGAAGTGGTTCGCA<br/>           CGGACAGTTTAAAAGCCGGAGAGGTGCTTTACCTCGAAGCCGAAGAGCCACAGGATCCCTCTCCCCCTCACCTCCGGTG<br/>           AGTCTGATCAGTGCCCTCGTCAGAGCCACGTCGATTCCAATCCGGCAATGACCAGCCTGGACTATCCAGGTTCCAGGCAA<br/>           CCCTGACTATCAGATG</p>                                                                                                                 |
| <p><i>&gt;Etv1</i><br/>           GTGCCTGTGCTCACTTTGATGAGAGCATGACCTACATGCCGAAGGGGGCTGTGCAACCCTCACCCCTACAACGAAGGATA<br/>           CGTGTACTAACATGAGTAACCCGTCAAGCAAGGCACCCCGTTCGCTCTTTTTTTTTCAAGATGCAGAGAATCACCGAATT<br/>           CTCTTCGATGTTTGTATTTCTGTGTTTGTACTTTATTTTTAAATGATAATACAAAAGGGGGCTTTTCTGTTGCATTATTC<br/>           TATGGTCTGCCATGGACTGCGCACTTATTTGCTGGTGGGCGGGAGTAATCTAGACATTCATTCTTTGTAACAGGAAGATGGCG<br/>           GATGAGTGGGCAGAAGGAGCTGAGGGATTCCTTTTTGCTTAGGCTTGGAAATGGAGTCCACAGGTTTCTGTATGATGATGCTAT<br/>           ATCATATTTGTTTCGATTTTCAATAACGTAAGATAATTTTCCCTGGGATCTACGGTACAGTTGATTTACGTTGTGTAATAATCT<br/>           TCTTGGAGACATTTGCCTTGGGCATTTCCCCATCATTACTGAGTCTCTGCAGGTGTACAAAAATCTACTGTAAATGGCAGTT<br/>           TAATGTTAGAAATTACTGTTTTGCACCTCTTGTAATAAAAAAATATTTAGCAATTGCATTTGTTGTTCTTCTGTTTCATAATGC<br/>           TTTACAGATGACTTTAGAGGAAAACCTAAATGTGGGCAATCTCTCTGAAGTTGAGTAATCACCATGACTGTAAATGAGGG<br/>           CCACCGTTTTGGACTCTGGCTCCAATGAGTACAGGGCCAGTA</p>                                                                                                                                                                                                                                                                                            |
| <p><i>&gt;Rorb</i><br/>           GCACAGAACATCATTAAAGTCCCATTGGAGACATGTGAGTACACCATGGAAGAAGTCCATCAGCTGGCATGGCAGACCCACAC<br/>           CTACGAGGAAATCAAGGCGTATCAAAGCAAGTCCAGGGAGGCTCTGTGGCAGCAGTGTGCCATCCAGATCACCCATGCTATCC<br/>           AGTACGTGGTGGAGTTCGCCAAGCGGATAACAGGCTTCATGGAGCTGTGTCAGAACGATCAGATCTTACTTCTGAAGTCAGGT<br/>           TGCTTGGAAAGTGGTTTTAGTGAGAATGTGCTGTCCTTCAACCCATTAAACAACACTGTTCTGTTTGAAGGAAAATATGGAGG<br/>           AATGCAATGTTCAAAGCCTTAGGTTCCGGATGACCTAGTGAATGAAGCATTGACTTTGCGAAGAATCTGTGTTCTTTCGAGCT<br/>           GACTGAGGAAGAGATTGCTGTCTCCTCTGCTGTTCTGATATCCCCAGACCCAGCCTGGCTGATCGAACCAAGAAAAGTCC<br/>           AGAAGCTTCAGGAAAAGATTTATTTGCACTGCAACATGTGATTGAGAAGAACCACCTGGATGATGAGACCCTGGCAAAGTTA<br/>           ATAGCCAAGATACCAACTATCACGGCAGTCTGCAACTTGCATGGGGAGAAGCTGCAGGTATTTAAGCAGTCTCATCCAGACAT<br/>           AGTGAATACACTGTTTCTCCATTGTACAAGGAGCTTTAATCCTGACTGTGCTGCGGTCTGCAAAATGAAGGGGACGAGAAC<br/>           TCTCAGAGTCATGGAATGCATCGCCGTTAAGACAAAAGCAATGTGTTTCATGGGACTTAAAGGAAAATGTCACTACTGCAACAT<br/>           TAGGAATGCTCTGCACTTAATAGAAATATTTTTACCGCTACAGTTTGAAGAATGTAATATGCACCTGAGTGGGGCTCTTTTG<br/>           TTTGTTCTGTTTGTGTTTGTGTTTTTGAATGATCATAAATATACAAATATAGGACACTGGGTGTTATCTTTTTTAATTTTATT<br/>           CGGGTATGTTTTGGAGACAACCTG</p> |

>*Cux2*

GAGCTGGACATACTCCATCACCAAGAGAGTCAAGGAGGTCCTACCGACAACAACCTAGGGCAGCGGCTGTTGGTGAGA  
GCATCTGGGGTTGACCCAGGGCTCCGTGTGATCTGCTGTCGAGGCCCAAGCCCTGGCACAACCTGAGCTTGAAGGGCCGG  
GAGCCCTTTGTGCGTATGCAGCTGTGGCTGAGTGACCCCAACAACGTGGAGAAGCTTCGGGACATGAAGAAGCTGGAGAAGA  
AAGCCTATCTGAAGCGCCGCTATGGGCTCATCGGCACCGGCTCGGACAGCGAGTACCCGGCTGCGCACTCCGAGTGCCCCAGC  
CCGTGTTTGCAGCCCCAGGAGTTGAGTCTCATGCAGGCCAAGAAGCCAGGGTGGTGTGCTGGCGCCCGCCGAGAAGGAGGCTCT  
GCGGAAGGCTACCAGCTCGAGCCGTACCCCTCGCAGCAGACCATAGAGCTGCTCTCCTTCCAACCTAACCTCAAGACGAACA  
CCGTCACTAACTGGTCCACAACCTACAGGTCCAGGATGCGCCGTGAAATGCTGGTGGAGGGGACACAGGATGATCCTGACTTT  
GACCCGAGTGGGGGTCCCAATGTCTGACGCCAGGCCACACCCACAGAGAGCCACCCACAGAGCCCCGACTCAGAGACTG  
AGGACCAAAAGCCCCCATGAAGAGCTTAGAGCTGCAAGAGCCTGAGGGTCCCCTACAGCGAGCTGCCCCAGACAGGGCTCT  
GGTGAAGATCAAACAGGAAGAGGGTTTGGAGGTGGATGGACAGCAGCCAGCCACAGGATGTGGGGGATCCAGACCCAGGGCA  
AGATGGCCCCAAAGAGGAGCATAACCACCTCTGGGAAACAGTGACCTCTCAGAGCTGGCCCCAGGGCCCTTTCTTTCAGGCA  
CACCCAATCCAGACTGTCTTCATTGCACAACCCCAAGAAAAGGGGACTGGGGAACAGGTTCACTCAGAGCCTCTGAGTTTC  
AAGTCCA

>*Mgst3*

GGTGAGCCAGAGCCAAGATGGCTGTCTCTAAGGAGTATGGATTTGTGCTTCTACTGGTGCTGCCAGCTTTGTGATGGTGC  
TCCACCTAGCCATCAACGTGGGCAAAGCCCCGAAGAAGTACAAGGTAGAGTACCCTGTCATGTACAGCACAGATCTGAGAA  
CGGGCATAATGTTCAACTGCATTCAGCGCGCCACCCAGAACCGTTGGAGGTGTACCCTCCCTCTCTGTTTTCCTAACCTGGGG  
AGGTGTTTACCACCCGCGCATAGCTTCTGGCCTGGCCCTGGCCTGGATTATTGGGCGAGTCTTTACGCATATGGCTACTACAC  
AGGAGACCCTAGCAAGCGGTATCGAGGAGCCGTGGGCTCTCTTGCCTCTTTGCCCTGATGGGCACCACCGTGTCTGTCTT  
CCAGCATCTCGGCTGGATCAGACCAGGCTTAGGCTACGGGTCCAGATCTGCCACCCTGAGGTGTGGAGGGCCTTCCGACTC  
TCACTACCTCCAGCAGCTCACCTGA

>*Wnt7b*

ACGCAATGGTGGTCTGGTACCCAATGGAGACAAAATCCCTTTACTTCTCTTTGGGAAAGTGAACCACAAAGGGACCATGAGACT  
CTGAGGGTCACTCCCTGCCTGTGACTGGACACAGAAAAGGCCACACCCACCAGTCACTCAAAAACGGTTTCCCTGGGCTGTTT  
CCTGCCGGCCCTGGGCAGTGTGGATGGATGTTGACAAAATTATTTATGTTTTCTTAGCATCAGATGAGGACTCAGTACTAACA  
CTGGGTAGCCAGACCTAACCTATTTGAGGACACCCCTCCCTCACTCTCCCGGCCCTCCCTGCAGGGTCTCTGTCTCCTGC  
AGAACTCGAGGATGTCAGAATTGGCACGGAAGCTGGCTGGTGGGGGGACTCCTTATCAGCACCTTGGGAGGGGCTTGGTGGC  
CCTACAAGGCTGAGATGGCCGACAGAGGACAGCCAACTTCCATTCCATTTGGAGACTGTCATGCAAATCAAATGTCCCTTGT  
GTCAGGCTCCAGGATGCCTGTCTCTCCCTGGTCTTACCCTCCAGCCTGTGCAACCTCCACCTCCAGTTTACAAAATTC  
TCTTCTCTCTGGAGCCAACCTGACACCCAGGACTGCCCCACAGGTTCAAGGAGAGGTCAGGGACAGTTGCCCCACATGACAGA  
TGGACAGAGGGCAATCTGAAGATTTACTGGAGACCCACGGCTCTGTGAAATAAATACTGACACGCCCCATCCAGCCCCA  
CTCTGGAAGTTGCCAGGTGATGGGAGGCTGACCCCTTTTCAGTACCTTGGGTTTTGTCTTCTTGTGATGATGATGCCAG  
AGAATGACATCCAGAATTTAGGGATGATTTGGTCAGGCCCTGCCTAGTGTCCACTGATACCTGCTTCAGGGTCTTATATT  
ATGAGGACATGGGACCCTCAAACAGGGTCCGTGGGAAGCTTAATGTCCATTTCTCAGGCCCT

>*Calm2*

CTGACCAACTGACTGAAGAGCAGATTGCAGAGTTCAAAAGAAGCTTTCTACTATTTGACAAGGACGGGGATGGGACAATAAC  
AACAAAGGAGCTGGGGACAGTGATGAGGTCCCTGGGGCAGAACCCACAGAAGCAGAAGTGCAGGACATGATCAATGAAGT  
AGATGCGGATGGTAATGGCACAATTGATTTCCCTGAATTTCTGACAATGATGGCAAGAAAAATGAAAAGACACAGACAGTGAA  
GAAGATTAGAGAAGCATTCCGTGTGTTTGATAAAGGATGGCAATGGCTATATTAGTGCAGCAGAGCTTCGCCATGTGATGAC  
AAACCTTGGCGGAGAAGTTAACAGATGAAGAGGTGATGAGATGATCAGGGAAAGCAGACATTGACGGGGACGGTCAGGTA  
CTACGAAGAGTTGTACAAATGATGACAGCGAAGTGAAGACATTGTACAGAATGTGTTAAATTTCTGTACAAAATGTTTATT  
GCCATTTCTTTGTTGTAACCTATCTGTAAAAGGTTCCCCCCCCCTACTGTCAAAAATATGCATGTATAGTAATTAGGACTTCA  
TTCCTCCATGTTTTCT

>*Kif1a*

CTTCGGAAATGACACTAGGACCTTCTACCAGTTTGAAGCAGCCTGGGACAGTTCATGCATAAATCTCTCTCTGCTGAATCGTGT  
CACCCCTTACCGGGAGAAAATCTACATGACGCTCTCTGCCTACATTGAGATGGAGAAGTGTACCCAGCCAGCTGTATCACCA  
AGGACTTCTGCATGGTTTTCTACTCTCGGGACGCCAAGCTACCCGCTCACGCTCCATTCGCAACCTGTTTGGCAGTGGCAGCC  
TGCGGGCCACAGAAGGCAACCGTGTGACTGGTGTGATGAGCTACGCTTTGCCACGTGGCCGACGCAGGCAGCCAGGGAT  
GCAGCGTCGGCGCCGGGGTGTGACACATCAGTAGCCTATGTCCGGGGTGAGGAGAACTGGCTGGCTGGAGGCCCCGA  
AGTGACAGCCTGATCCTAGATCACCAGTGGGAACTGGAGAACTGAGCCTTTACAGGAGGTGGAAAAGACCAGGCCTACTACC  
TGCTCTTCGGGAGAAGCTGGAGACGACCCAGCCCTGGCCCTGAGGTGCTGTCCCAAGCTCCAGTGAAGACTCTGAGTCC  
CGTAGTTCTTCAGGTGCTCTTCCCCATTGTACGCCGAGGGTACGCGTACCTCTGGAGGCTCCCAACGAGAGGCAGAGGGA  
GCTGGCTGTCAAGTGCTTACGACTCCTCATGCACACATTCAACAGGGAATACACC

**Figure S1: Related to Figure 1. TBR1 expression in mPFC of P5 and P21 Layer 5; TBR1 genomic binding; *Mgst3* – a new layer 5 marker.**

**(A)** Immunohistochemistry (IHC) was used to determine the overlap between TBR1 and *Rbp4-cre::tdTomato*<sup>f/+</sup> reporter in wildtype mPFCx at P5 and P21. Scale bar = 100  $\mu$ m.

**(B)** Quantification of tdTomato<sup>+</sup>/TBR1<sup>+</sup> cells in wildtype mPFCx at P5 and P21. Neonatally (P5) ~60% and postnatally (P21) ~85% of reporter<sup>+</sup> cells (layer 5 excitatory neurons) are TBR1<sup>+</sup>. Error bars represent SEM of TBR1<sup>+</sup>/tdTomato<sup>+</sup> cells in wildtype mPFCx at each age.

**(C)** TBR1 genomic binding (ChIP-Seq) on wildtype whole cortex at P2 (red tracks). Red boxes represent the TBR1 binding that reached statistical significance. TBR1 directly regulates a subset of genes involved in spine maturation and synaptogenesis, including *Ctnnb1*, *Gsk3 $\beta$* , *Kif1a*, *Map1a*, *Map1b*, and *Wnt7b*. TBR1 also directly regulates *Mgst3*, a new layer 5 marker. Genes are shown in blue. Black arrow indicates the direction of transcription. Genomic scale (in Kb) are shown for each locus. **(D)** *In situ* hybridization demonstrates the expression pattern of *Mgst3* in wildtype brain at P3. At this age, *Mgst3* is a layer 5 specific marker in the neocortex. Cortical layers 2-4, 5<sup>upper</sup>, 5<sup>lower</sup>, 6 and 6b (subplate) are labeled. Scale bar = 500  $\mu$ m.

A) TBR1 IHC in Wildtype mPFCx

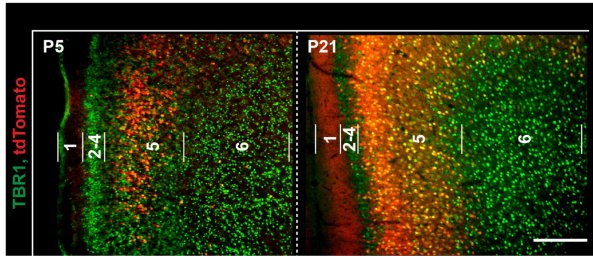

B) Quantification of TBR1<sup>+</sup>/tdTomato<sup>+</sup> in Wildtype mPFCx

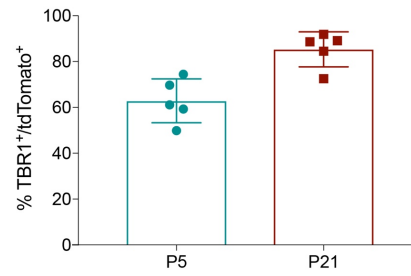

C) TBR1 ChIP-Seq Coverage of *Tbr1*-Regulated Genes at P2

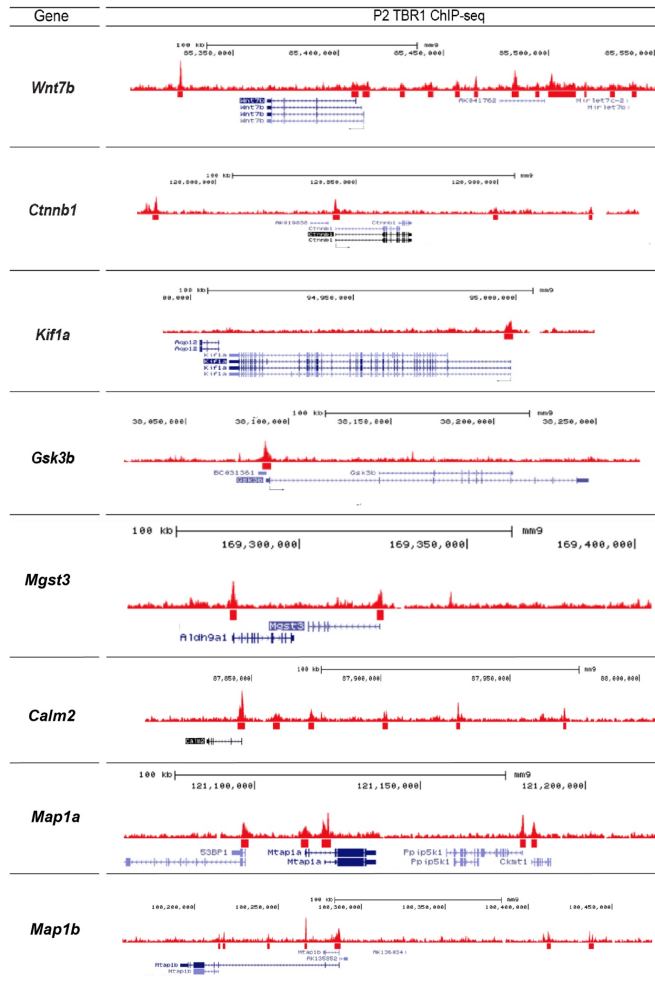

D) Wildtype *Mgst3* Expression

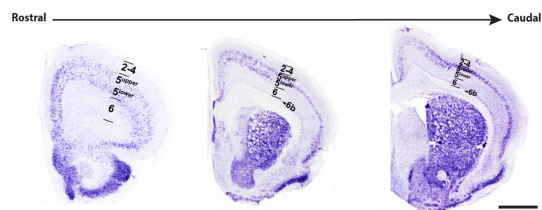

**Figure S2: Related to Figure 1. Filtering and clustering of single-cell RNA-seq.**

(A) Histograms of the three metrics (number of unique molecular identifiers, number of genes, fraction of mitochondrial genes) used to filter low quality cells from single-cell data. Red line denotes thresholds. (B) Boxplots displaying the fraction of mitochondrial content per cell for both publication and initial pilot experiments suggest 30% is an ideal threshold for this dataset. The pilot experiment data was not included due to lower coverage and lack of *Tbr1*<sup>layer5</sup> heterozygous CKOs. (C) Thresholds were adapted to better fit the neuronal cell population. (D) tSNE plot displaying 17,396 single cells colored by identified cell type and (E) genotype show cell-type is stronger predictor than library preparation. All experiments for the three genotypes was performed simultaneously and run on the same 10x chip. (F) tSNE plot displaying 11,070 single cells colored by genotype.

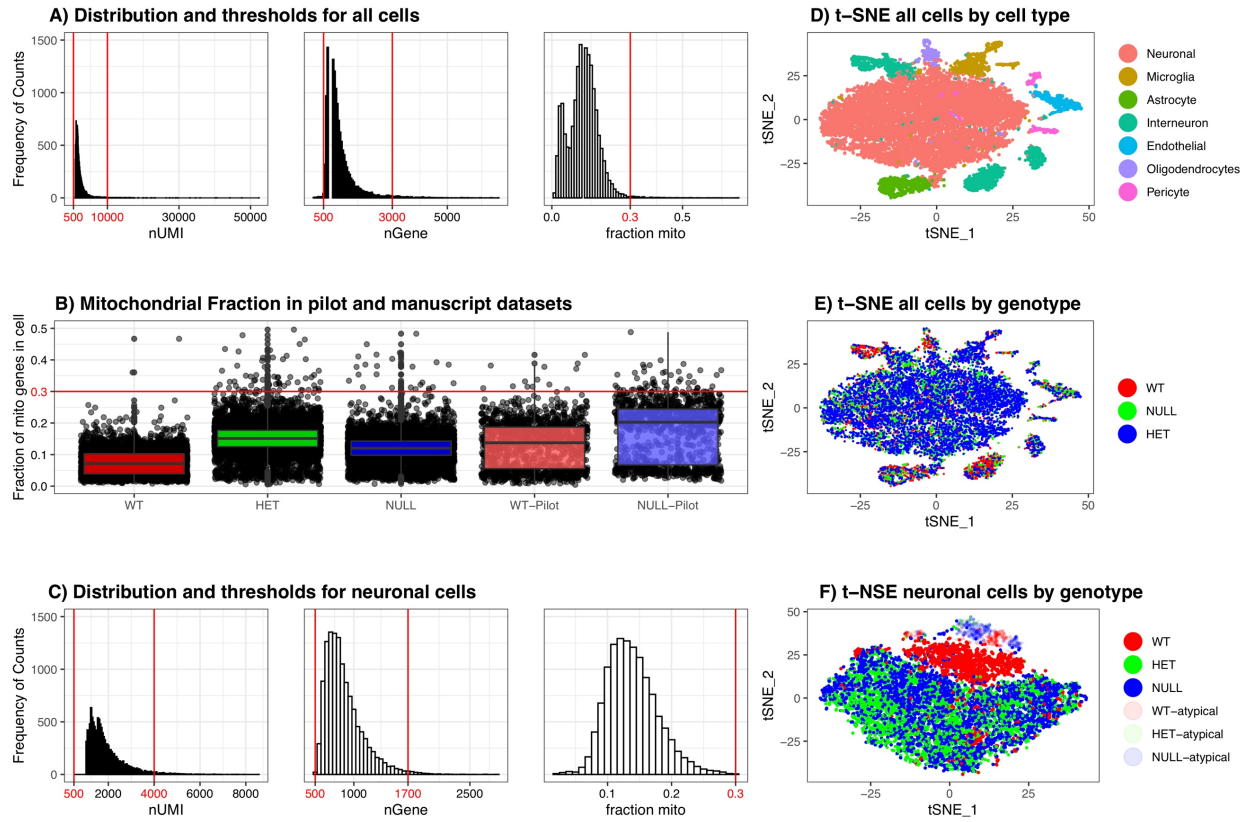

**Figure S3: Related to Figures 1 and 2. Classical cortical layer 5 markers expressed in single-cell data and expression plots for select differentially expressed genes.**

**(i)** Feature plots displaying the normalized expression of select markers *Nrgn*, *Bcl11b*, *Foxp1*, and *Neurod6* across the neuronal cell population. **(ii)** Density plots showing the distribution of expression values for select DEX genes in neuronal across genotypes. *Calm2* and *Mgst3* are upregulated in *Tbr1<sup>layer5</sup>* homozygous CKO, while *Kif1a* and *Cox7b* are downregulated.



**i) Feature Plots of L5 Markers**

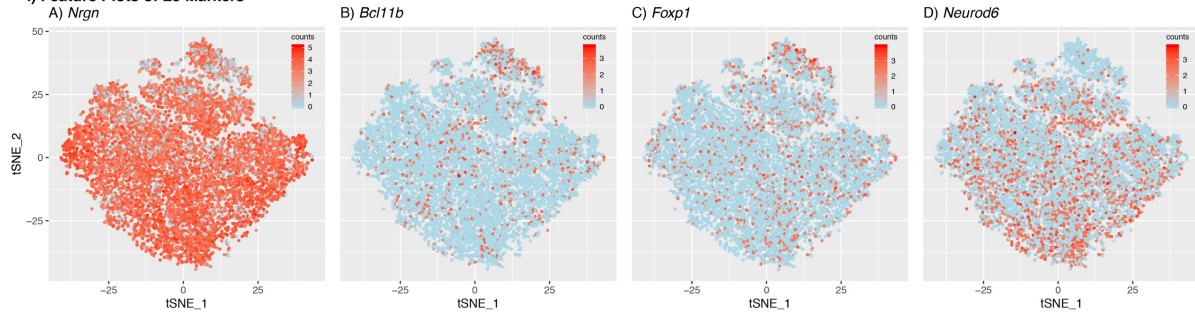

**ii) Density Plots of select differentially expressed genes**

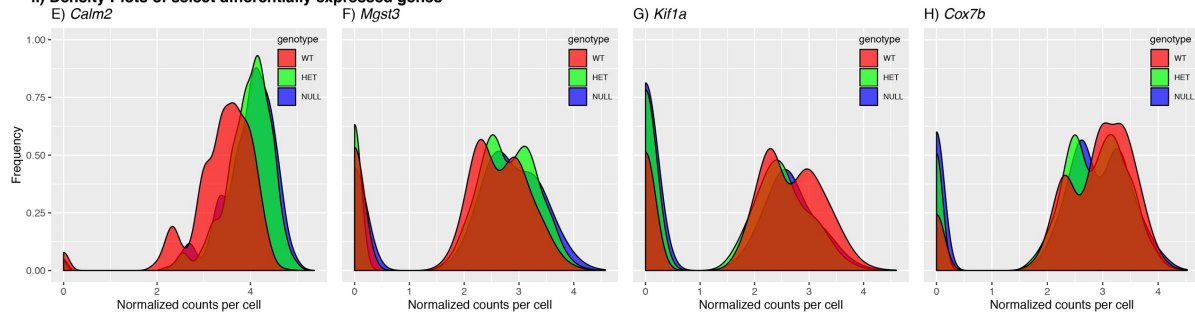

**Figure S4: Related to Figure 3. Loss of *Tbr1* in layer 5 reduces excitatory and inhibitory synaptic input onto the layer 5 pyramidal neurons in mPFCx at P21.**

(A) Schematic representation of medial prefrontal cortex (mPFCx, blue boxes). The blue box represents the region of mPFCx utilized for imaging and whole-cell patch clamp experiments. (B, C) Schema of layer 5 projection neuron (red) in mPFCx of *Tbr1*<sup>wildtype</sup> (B) and *Tbr1*<sup>layer5</sup> CKOs (C). The purple rectangles indicate the zone within layers 2/3 where synapse numbers were analyzed. Pipette tip indicates that the soma was patched during the electrophysiology recordings (B, C).

(i) Excitatory synapses were analyzed via synaptic bouton staining onto apical dendrites of layer 5 neurons (n=30 dendrites) and spontaneous EPSC (sEPSC) recordings from the soma of (D) *Tbr1*<sup>wildtype</sup>, (E) *Tbr1*<sup>layer5</sup> heterozygous, and (F) *Tbr1*<sup>layer5</sup> homozygous CKOs at P21 (D-F). *Rbp4-cre::tdTomato*<sup>fl/+</sup> allele was used to label the layer 5 neurons (red). ImageJ software was used to process confocal images for quantification. (G) Quantification of excitatory synaptic density. Excitatory synapse numbers were reduced by 37% in *Tbr1*<sup>layer5</sup> heterozygous (BD = 0.680, p<0.0001) and 74% in *Tbr1*<sup>layer5</sup> homozygous CKOs at P21 (BD = 0.286, p<0.0001) (H) Sample traces of sEPSC recordings at -70mV in mPFCx slices from *Tbr1*<sup>wildtype</sup> (red), *Tbr1*<sup>layer5</sup> heterozygous (green), and *Tbr1*<sup>layer5</sup> homozygous CKOs (blue) at P21. (I) Quantification of the sEPSC frequency in layer 5 neurons at P21 (n = 6/6/6, wildtype/ heterozygous/ homozygous cells from two different animals/genotype; One-way ANOVA,  $F_{(2,15)} = 23.18$ , p < 0.0001; t-test, Tukey correction, wildtype v. homozygous:  $q_{(15)} = 9.416$ , p < 0.0001; heterozygous v. homozygous:  $q_{(15)} = 6.455$ , p = 0.001).

(ii) Inhibitory synapses were examined by synaptic bouton staining onto apical dendrites of layer 5 neurons (J – L) and spontaneous IPSC (sIPSC) recordings from the soma of the layer 5 neurons of (J) *Tbr1*<sup>wildtype</sup>, (K) *Tbr1*<sup>layer5</sup> heterozygous, and (L) *Tbr1*<sup>layer5</sup> homozygous CKOs at P21. *Rbp4-cre::tdTomato*<sup>fl/+</sup> allele was used to label the layer 5 neurons (red). ImageJ software was used to process confocal images for quantification. (M) Quantification of inhibitory synaptic density at P21. Inhibitory synapse numbers were reduced ~26% in *Tbr1*<sup>layer5</sup> heterozygous CKOs (BD = 0.816, p<0.0001) and ~71% decrease in *Tbr1*<sup>layer6</sup> homozygous mutants (BD = 0.319, p<0.0001). (N) Sample traces of sIPSC recordings in voltage clamp at +10mV in SSCx slices from *Tbr1*<sup>wildtype</sup> (red), *Tbr1*<sup>layer5</sup> heterozygous (green), and *Tbr1*<sup>layer5</sup> homozygous CKOs (blue) at P21. (O) Quantification of the sIPSC frequency in layer 5 neurons at P21 (n = 7/7/7, wildtype/ heterozygous/ homozygous cells from two different animals/genotype; One-way ANOVA,  $F_{(2,18)} = 5.159$ , p = 0.0169; t-test, Tukey correction, wildtype v. homozygous:  $q_{(18)} = 4.534$ , p = 0.0129). Two-way ANOVA was used for the statistical analysis of the control, heterozygous and null. Two-tailed T-test with Tukey correction was used for pairwise comparisons. Floating bar graphs represent the min-max distribution of synaptic density and/or E/IPSC frequency measured from each genotype. Horizontal line in each box denotes the average distribution. Average distribution is numerically indicated in each box. BD = Bouton Density. (\*p< 0.05) (\*\*p< 0.01) (\*\*p<0.001) (\*\*\*\*p< 0.0001).

A) mPFC Schema

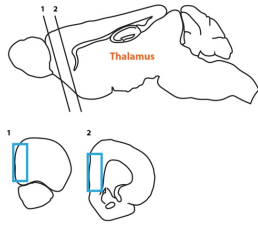

B) Control Schema

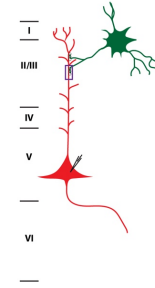

C) Null Schema

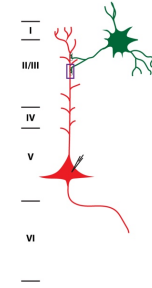

i) *In vivo* Excitatory Synapse Analysis of *Tbr1*<sup>layer5</sup> CKO at P21

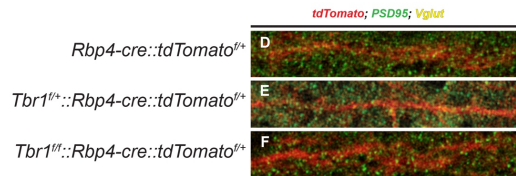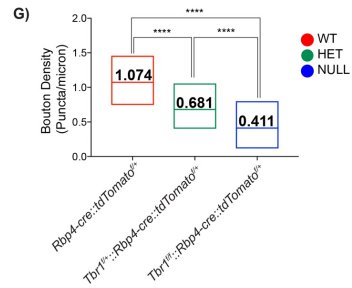

H) sEPSC

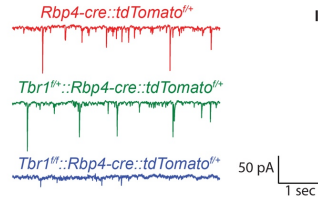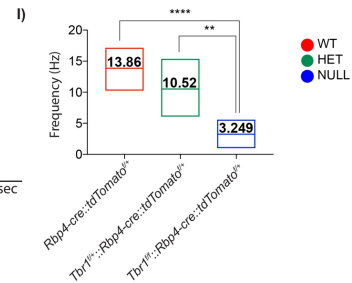

ii) *In vivo* Inhibitory Synapse Analysis of *Tbr1*<sup>layer5</sup> CKO at P21

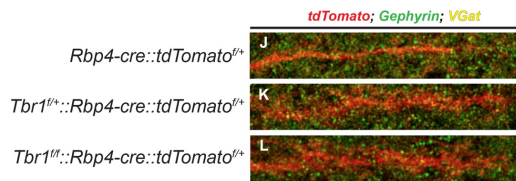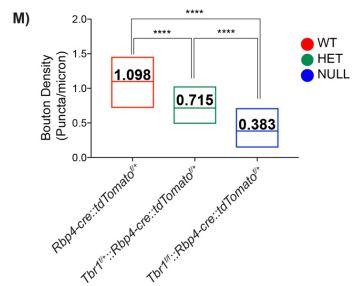

N) sIPSC

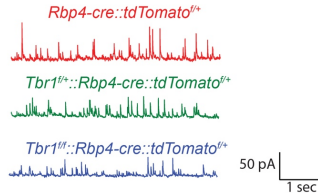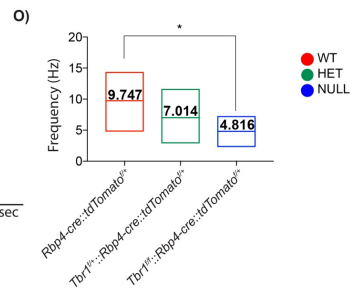

**Figure S5: Related to Figure 3. Loss of *Tbr1* in layer 5 prefrontal cortex results in an increase in hyperpolarization-activated cation currents ( $I_h$ ).**

Whole-cell patch clamp recordings from layer 5 mPFCx at P56 (A-D) show that many intrinsic electrophysiological properties were unaffected by loss of *Tbr1*, including resting membrane potential (B), input resistance (C), and action potential half-width (data not shown). (D) “Sag and rebound” is increased in *Tbr1*<sup>layer5</sup> mutant neurons (n = 7/6/7, wildtype/ heterozygous/ homozygous cells from two different animals/genotype; One-way ANOVA,  $F_{(2,17)} = 13.18$ ,  $p = 0.0003$ ; t-test, Tukey correction, wildtype v. heterozygous:  $q_{(17)} = 3.693$ ,  $p = 0.0457$ ; wildtype v. homozygous:  $q_{(17)} = 7.258$ ,  $p = 0.0002$ ). (E) Neurons were held in current clamp at -70mV. The resonant frequency was measured as the frequency at which the impedance profile reached its peak (arrows). Ratio of the fast Fourier transform of the voltage response (Fig. S6E top) to the fast Fourier transform of the sinusoidal current stimulus (Fig. S6E middle) to calculate the impedance amplitude profile (Fig. S6E bottom). We defined the resonant frequency as the frequency at which the impedance profile reached its peak. Scale bar = 5 mV, 5 s. (F) ZD7288, an HCN channel blocker, decreased resonance frequency by over 50% in *Tbr1*<sup>layer5</sup> heterozygous (green), and *Tbr1*<sup>layer5</sup> homozygous mutants (blue). (G) Quantification of changes in resonant frequency of *Tbr1*<sup>wildtype</sup> (red), *Tbr1*<sup>layer5</sup> heterozygous (green) and *Tbr1*<sup>layer5</sup> homozygous mutants (blue) before and after ZD7288 treatment (n = 7/8/8, wildtype/ heterozygous/ homozygous cells from two different animals/genotype; One-way ANOVA,  $F_{(2,20)} = 16.24$ ,  $p < 0.0001$ ; t-test, Tukey correction, wildtype v. heterozygous:  $q_{(20)} = 7.075$ ,  $p = 0.0002$ ; wildtype v. homozygous:  $q_{(20)} = 7.038$ ,  $p = 0.0002$ ). Grey-filled boxes represent brains that were treated with ZD7288. Floating bar graphs represent the min-max data distribution from each genotype. Horizontal line in each box denotes the average distribution. Average distribution is numerically indicated in each box. (\*\* $p < 0.01$ ) (\*\*\*) $p < 0.001$ ).

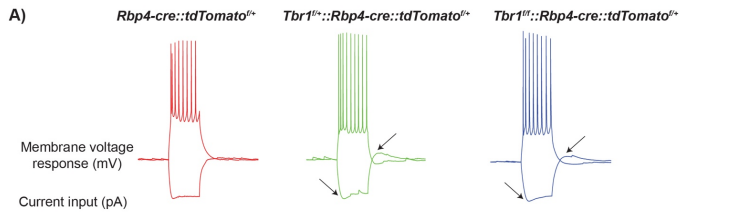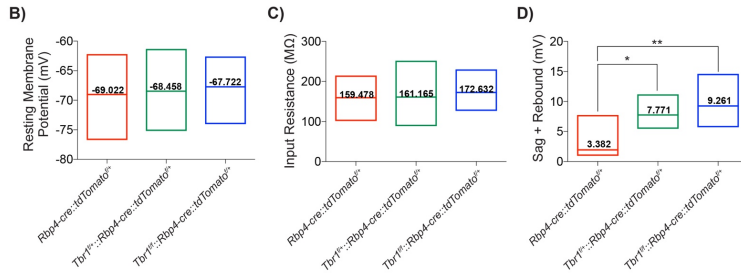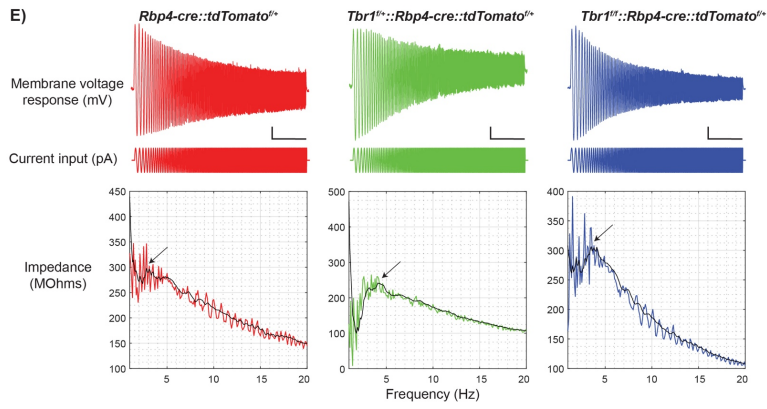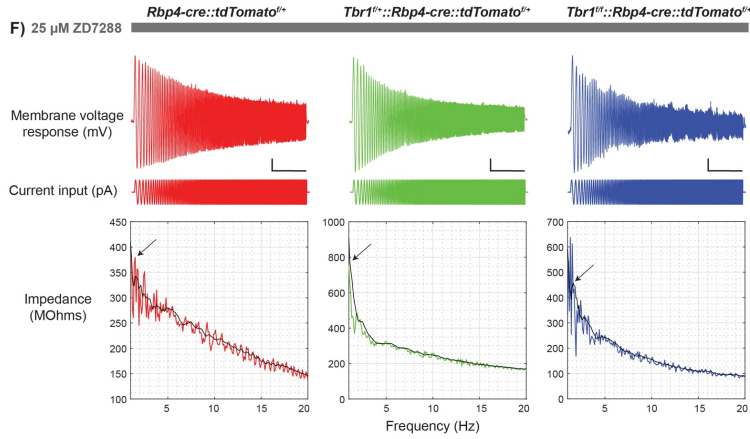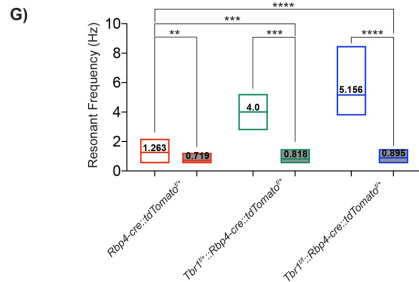



**i) In Vivo Dendritic Spine Analysis of *Tbr1*<sup>layer6</sup> CKOs**

**A) SSCx Layer 6 Pyramidal Neurons at P5 and P21**

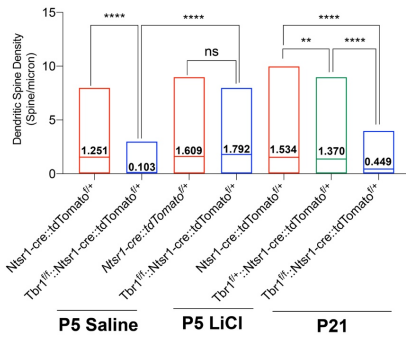

**B) SSCx Layer 6 Pyramidal Neurons at P60, 24 hrs After LiCl Treatment**

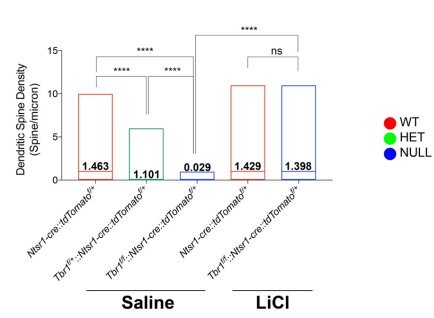

**ii) In Vivo Dendritic Spine Analysis of *Tbr1*<sup>fl/y</sup> at P60, 24 hrs After LiCl Treatment**

**C) mPFCx Layer 5 Pyramidal Neurons**

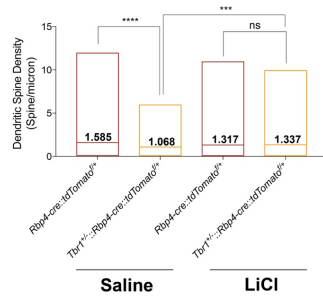

**D) SSCx Layer 6 Pyramidal Neurons**

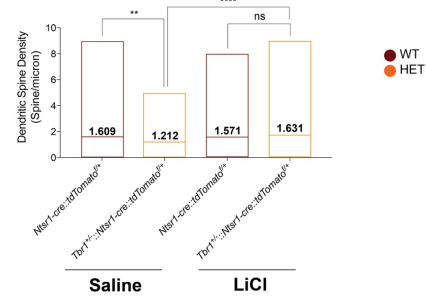

**iii) In Vivo Filamentous Spine Density**

**E) mPFCx of *Tbr1*<sup>layer6</sup> CKO**

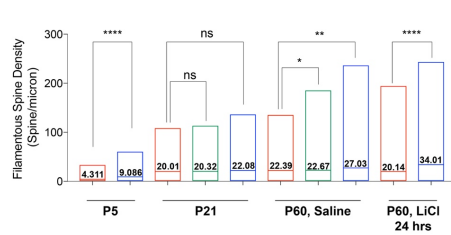

**F) SSCx of *Tbr1*<sup>layer6</sup> CKO**

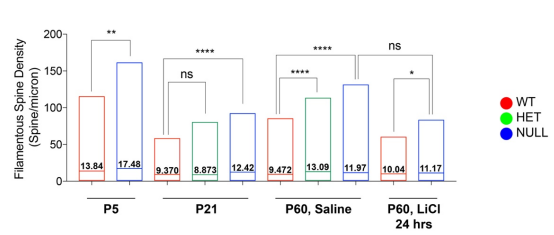

**G) mPFCx of *Tbr1*<sup>fl/y</sup>::*Rbp4-cre*::*tdTomato*<sup>fl/y</sup>**

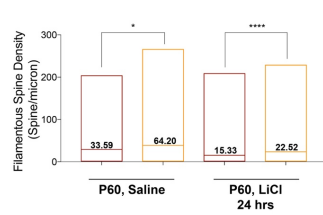

**H) SSCx of *Tbr1*<sup>fl/y</sup>::*Ntsr1-cre*::*tdTomato*<sup>fl/y</sup>**

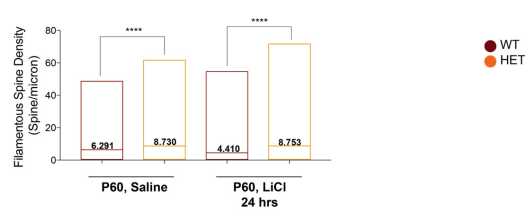

**Figure S7: Related to Figure 5. LiCl treatment at P5 and P60 restores normal synapse numbers in *Tbr1* mutant mice, 24hrs after treatment.**

Excitatory (i) and inhibitory (ii) synaptic density was quantified at P5 and P60 from (1) apical dendrites of *Tbr1<sup>layer5CKO</sup>* and *Tbr1<sup>layer6CKO</sup>*, 24 hrs after injection with saline or LiCl (n=10 dendrites). Excitatory and Inhibitory synapses were defined by co-localization of VGLUT1<sup>+</sup> boutons and PSD95<sup>+</sup> clusters (excitatory) and VGAT<sup>+</sup> boutons and Gephyrin<sup>+</sup> clusters (inhibitory) onto endogenous tdTomato labeling layer 5 and/or layer 6 pyramidal neurons.

(i) Excitatory synapses are quantified from (A) layer 5 neurons of mPFCx of *Tbr1<sup>wildtype</sup>* (green) and *Tbr1<sup>layer5CKO</sup>* (orange), (B) layer 6 neurons of SSCx of *Tbr1<sup>wildtype</sup>* (red) and *Tbr1<sup>layer6CKO</sup>* (blue) mice at P60, 24 hrs after saline and/or LiCl was administered.

(ii) Inhibitory synapses are quantified from (E) mPFCx of *Tbr1<sup>wildtype</sup>* and *Tbr1<sup>layer5CKO</sup>* and (F) SSCx of *Tbr1<sup>wildtype</sup>* and *Tbr1<sup>layer6CKO</sup>* mice, 24 hrs after saline and/or LiCl was administered at P59. Floating bar graphs represent the min to max distribution of all excitatory and inhibitory synapse numbers measured from each genotype and treatment. Horizontal line in each box denotes the average distribution. Average distribution is numerically indicated in each box. Two-tailed T-test with Tukey correction was used for pairwise comparisons. ns = not significant. (\*\*\*)p<0.001 (\*\*\*\*)p<0.0001).



i) *In Vivo* Excitatory Synapse Analysis of *Tbr1* CKOs, 24 hrs After LiCl Treatment

A) P5

B) mPFCx of *Tbr1*<sup>layer5</sup> CKO

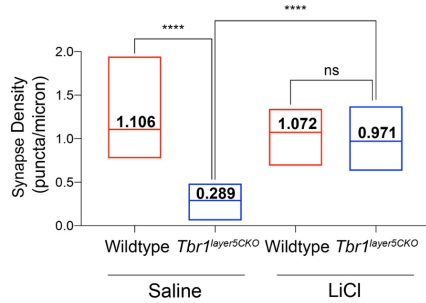

C) SSCx of *Tbr1*<sup>layer6</sup> CKO

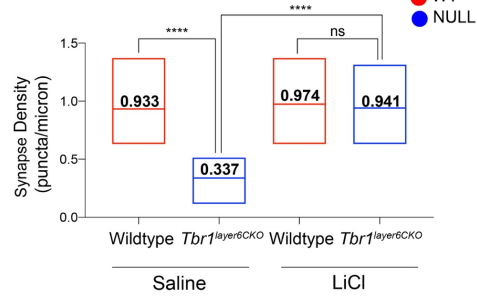

D) P60

E) mPFCx of *Tbr1*<sup>layer5</sup> CKO

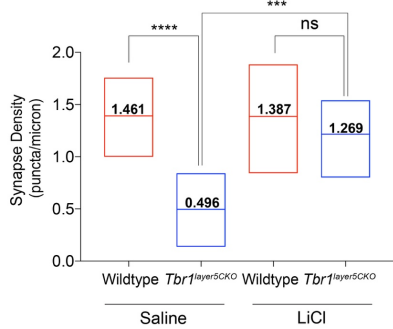

F) SSCx of *Tbr1*<sup>layer6</sup> CKO

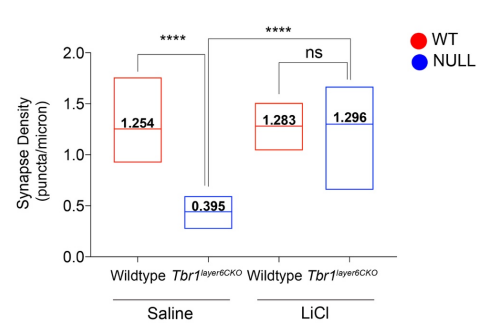

ii) *In Vivo* Inhibitory Synapse Analysis of *Tbr1* CKOs, 24 hrs After LiCl Treatment

G) P5

H) mPFCx of *Tbr1*<sup>layer5</sup> CKO

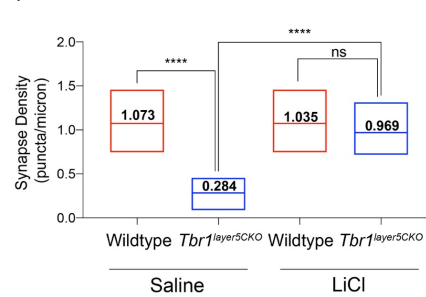

I) SSCx of *Tbr1*<sup>layer6</sup> CKO

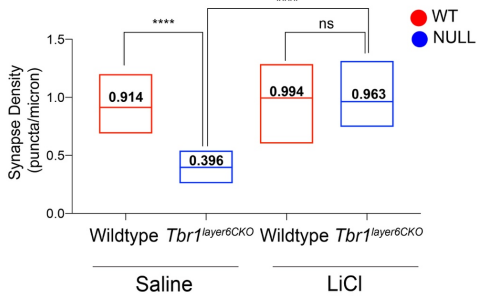

J) P60

K) mPFCx of *Tbr1*<sup>layer5</sup> CKO

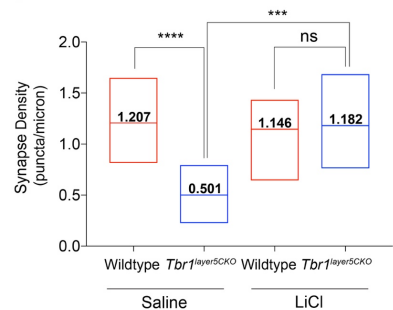

L) SSCx of *Tbr1*<sup>layer6</sup> CKO

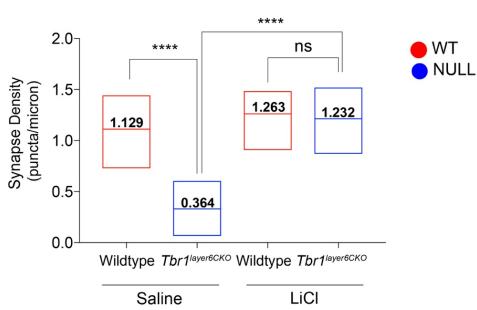

**Figure S8: Related to Figure 5. GSK3 $\beta$ -inhibitor (GSK3 $\beta$ i) treatment at P60 restores normal dendritic spine density and synapse numbers in *Tbr1* CKOs 24hrs after treatment.**

Excitatory (i) and inhibitory (ii) synaptic density was quantified at P60 from (1) apical dendrites of *Tbr1<sup>layer5CKO</sup>* and *Tbr1<sup>layer6CKO</sup>*, 24 hrs after injection with saline or GSK3 $\beta$ -inhibitor at P59 (n=15 dendrites). Excitatory and Inhibitory synapses were defined by co-localization of VGLUT1<sup>+</sup> boutons and PSD95<sup>+</sup> clusters (excitatory) and VGAT<sup>+</sup> boutons and Gephyrin<sup>+</sup> clusters (inhibitory) onto endogenous tdTomato labeling of layer 5 dendrites (in layer 2/3 of *Tbr1<sup>layer5CKO</sup>*) or layer 6 dendrites (in layer 5 of *Tbr1<sup>layer6CKO</sup>*).

(i) Excitatory (A) and inhibitory (B) synapses are quantified from layer 5 neurons of mPFCx of *Tbr1<sup>wildtype</sup>* (red) and *Tbr1<sup>layer5CKO</sup>* (blue) at P60, 24 hrs after saline or GSK3 $\beta$ -inhibitor was administered. (C) Imaris software was used to quantify the changes in mature dendritic spine density of layer 5 neurons of mPFCx of *Tbr1<sup>wildtype</sup>* (red) and *Tbr1<sup>layer5CKO</sup>* (blue) at P60.

(ii) Excitatory (A) and inhibitory (B) synapses are quantified from layer 6 neurons of SSCx of *Tbr1<sup>wildtype</sup>* (red) and *Tbr1<sup>layer6CKO</sup>* (blue) at P60, 24 hrs after saline or GSK3 $\beta$ -inhibitor was administered. (C) Imaris software was used to quantify the changes in mature dendritic spine density of layer 6 neurons of SSCx of *Tbr1<sup>wildtype</sup>* (red) and *Tbr1<sup>layer6CKO</sup>* (blue). Floating bar graphs represent the min to max distribution of all excitatory and inhibitory synapse numbers measured from each genotype and treatment. Horizontal line in each box denotes the average distribution. Average distribution is numerically indicated in each box. Two-tailed T-test with Tukey correction was used for pairwise comparisons. ns = not significant. (\*\*\*)p<0.001) (\*\*\*\*)p<0.0001).

**i) In Vivo Analysis of *Tbr1*<sup>layer5</sup> CKOs in mPFCx at P60, 24 hrs After GSK3 $\beta$ -inhibitor Treatment**

**A) Quantification of Excitatory Synapse Analysis**

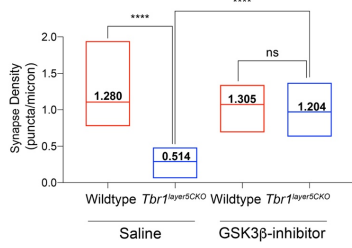

**B) Quantification of Inhibitory Synapse Analysis**

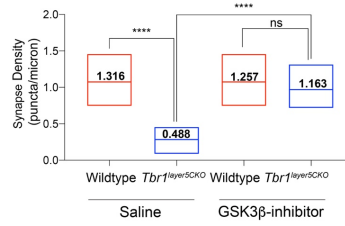

**C) Quantification of Mature Dendritic Spine Density**

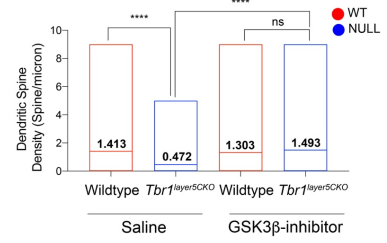

**ii) In Vivo Analysis of *Tbr1*<sup>layer6</sup> CKOs in SSCx at P60, 24 hrs After GSK3 $\beta$ -inhibitor Treatment**

**D) Quantification of Excitatory Synapse Analysis**

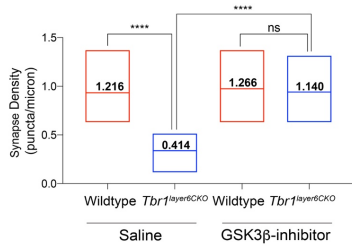

**E) Quantification of Inhibitory Synapse Analysis**

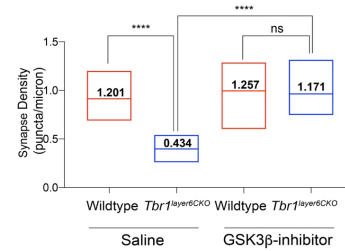

**F) Quantification of Mature Dendritic Spine Density**

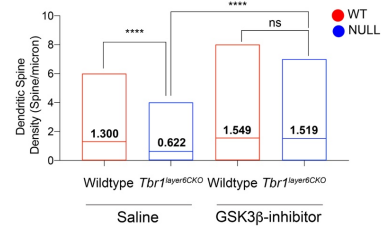

**Figure S9: Related to Figure 5. Restoring WNT-signaling rescues synaptic deficit through a cell-autonomous autocrine mechanism.**

**(i)** *In vivo* rescue assay was conducted by injecting a *Cre*-dependent lentivirus expressing *CAG-Flex-IRES-GFP* (empty vector) or *CAG-Flex-Wnt7b-IRES-GFP* lentiviral constructs into layer 6 of SSCx of *Tbr1<sup>layer6</sup>* wildtype, heterozygous and homozygous CKOs at P1. **(A, B)** Quantification of excitatory and inhibitory synapse numbers onto the layer 6 neurons of *Tbr1<sup>layer6</sup>* heterozygous (Het-WNT7B-GFP) and homozygous CKOs (Null-WNT7B-GFP) expressing WNT7B-GFP at P21 compared to wildtype (WT-WNT7B-GFP) and empty vector-injected (GFP only) animals including *Tbr1<sup>layer6</sup>* wildtype (WT; red), heterozygous (Het; green) and homozygous (Null; blue) CKOs. Overexpressing *Wnt7b* in wildtype layer 6 neurons (located by the presence of GFP) did not have an impact on excitatory and inhibitory synaptic density **(A, B)**. However, the regions expressing GFP in layer 6 cells of *Tbr1<sup>layer6</sup>* CKOs, showed an increase in excitatory and inhibitory synapse numbers **(A, B)**.

**(ii)** Transplant-mediated introduction of cortical interneurons expressing *Wnt7b* to test whether *Wnt7b* promotes synaptogenesis through a paracrine mechanism. Immature cortical interneurons (MGE donor cells; *Nkx2.1-cre::tdTomato<sup>fl/+</sup>*) were transfected with lentiviral constructs encoding *Gfp* [*Dlx112b-GFP* (control)] or encoding *Wnt7b* and *Gfp* (*Dlx112b-Wnt7b-GFP*). Transfected cells were transplanted in the P1 neocortex *Tbr1<sup>layer6</sup>* wildtype (WT; red) and homozygous CKO (Null; blue) and analyzed at P30. *Ntsr1-cre::tdTomato<sup>fl/+</sup>* allele was used to label the layer 6 neurons (red). **(C)** 4X and 10X magnification of tdTomato signal from transplanted interneurons within layer 5 of SSCx, and apical dendrites of layer 6 pyramidal neurons. MGE transplanted cells were identified as being both tdTomato<sup>+</sup> and GFP<sup>+</sup>. **(D)** ImageJ software was used to process confocal images for quantification. **(E)** Quantification of excitatory synaptic density onto layer 6 dendrites of *Tbr1<sup>layer6</sup>* wildtype (WT; red) and homozygous CKO (Null; blue) within layer 5 of SSCx at P30. **(F)** Quantification of excitatory synapses onto the soma of transplanted interneurons expressing either an empty vector control (*Dlx112b-GFP*) or the *Wnt7b* and *Gfp* vector (*Dlx112b-Wnt7b-GFP*).

**(iii)** *In vitro* rescue assay was conducted using *Cyp26b1* expression vector in cultured P0 neocortex from *Tbr1<sup>wildtype</sup>* (red) and *Tbr1<sup>layer6</sup>* CKOs (blue) (n=2). Excitatory and Inhibitory synapses were measured at P14. Synapses are defined by co-localization of VGLUT1<sup>+</sup> boutons and PSD95<sup>+</sup> clusters (excitatory) and VGAT<sup>+</sup> boutons and Gephyrin<sup>+</sup> clusters (inhibitory) onto endogenous tdTomato. **(G, H)** Quantification of excitatory and inhibitory synaptic density *in vitro*. Restoring *Cyp26b1* expression *in vitro* rescues excitatory and inhibitory synaptic deficit in *Tbr1<sup>layer6</sup>* CKOs (red) compared to wildtype control (blue). Floating bar graphs represent the min to max distribution of synaptic density measured from all genotypes and treatments. Horizontal line in each box denotes the average distribution. Average distribution is numerically indicated in each box. Two-tailed T-test with Tukey correction was used for pairwise comparisons. ns = not significant. (\*\*p<0.01) (\*\*p<0.01) (\*\*p<0.001) (\*\*p<0.0001).

**i) In vivo Synaptic Rescue Assay in *Tbr1<sup>layer6</sup>* CKO**

**A) Excitatory Synapse**

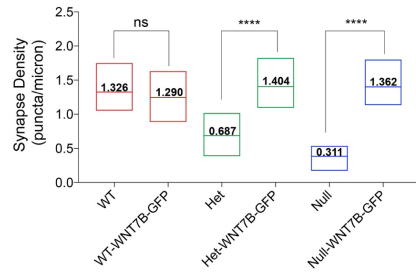

**B) Inhibitory Synapse**

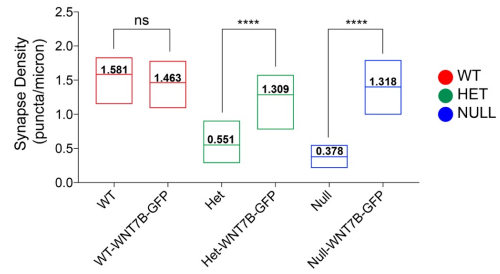

**ii) In vivo Synapse Analysis of MGE-Transplanted Cells onto Layer 6 Neurons of *Tbr1<sup>layer6</sup>* CKO**

**C) Low Magnification of MGE-Transplanted Cells.**

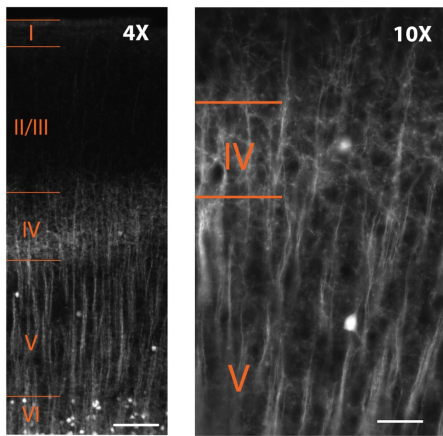

**D) Excitatory Synapse Analysis**

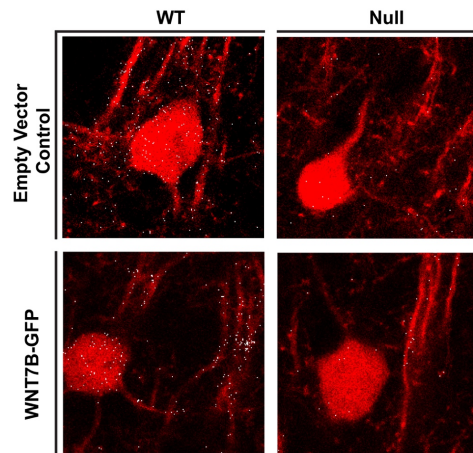

**E) Quantification of Excitatory Synaptic Density onto Dendrites of Layer 6 Neurons**

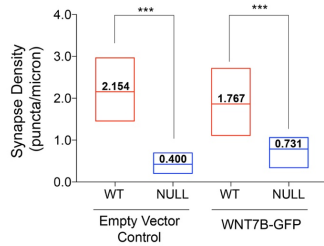

**F) Quantification of Excitatory Synaptic Density onto Soma of Transplanted Interneurons**

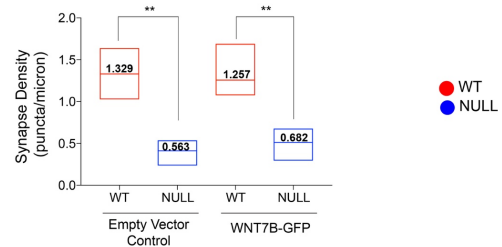

**iii) In vitro Synaptic Rescue Assay Using *Tbr1<sup>layer6</sup>* CKO Neurons**

**G) Excitatory Synapse**

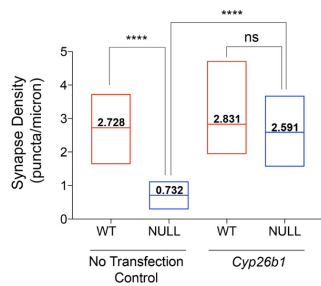

**H) Inhibitory Synapse**

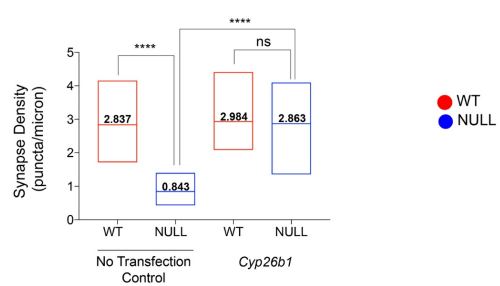

Supplement: NIHMS1622004-supplement-5.pdf [file NIHMS1622004-supplement-5.pdf]
